# Supplementary material for: Microbial dynamics inference at ecosystem-scale
Source: bioRxiv or medRxiv preprint supplement (doi:10.1101/2021.12.14.469105), 2023-06-15
Supplement: Supplementary file [file media-3.pdf]

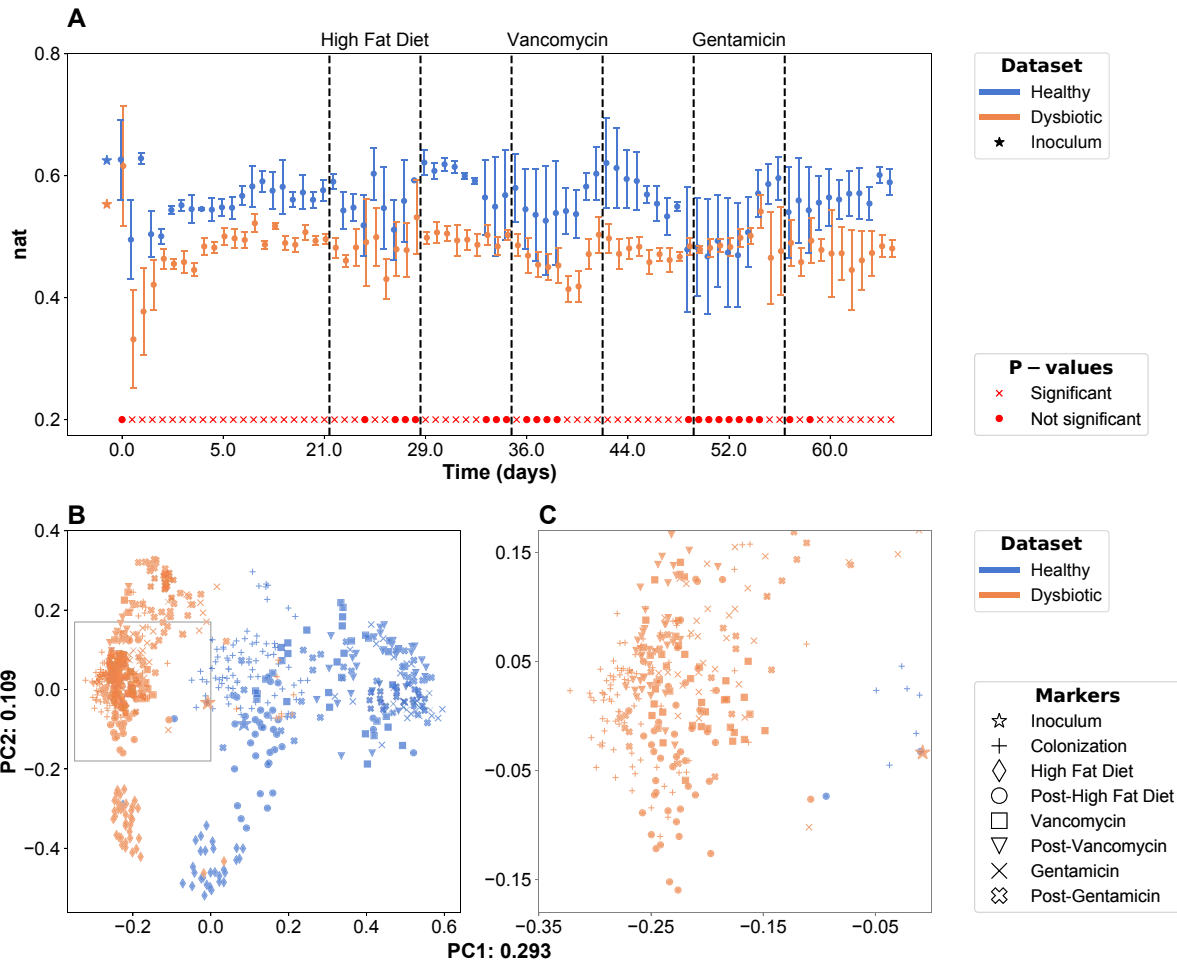

**Supplemental Figure 1: Microbiomes from healthy donors maintain ecological diversity over time while remaining ecologically distinct from microbiomes from dysbiotic donors. (A)** Alpha diversity (normalized Shannon entropy) for healthy and dysbiotic cohorts. Significance was assessed using the Wilcoxon rank-sum test and Benjamini-Hochberg correction. Mean and standard deviation are displayed for each time point. Stars indicate the diversity of the starting inocula. **(B)** PCoA plot of beta diversity (Bray-Curtis measure). **(C)** Zoom in from **(B)** (grey rectangle) showing that the dysbiotic donor cohort has less ecological diversity than the healthy donor cohort. Beta diversity between the two cohorts was significantly different ( $p=0.001$ , PERMANOVA test).

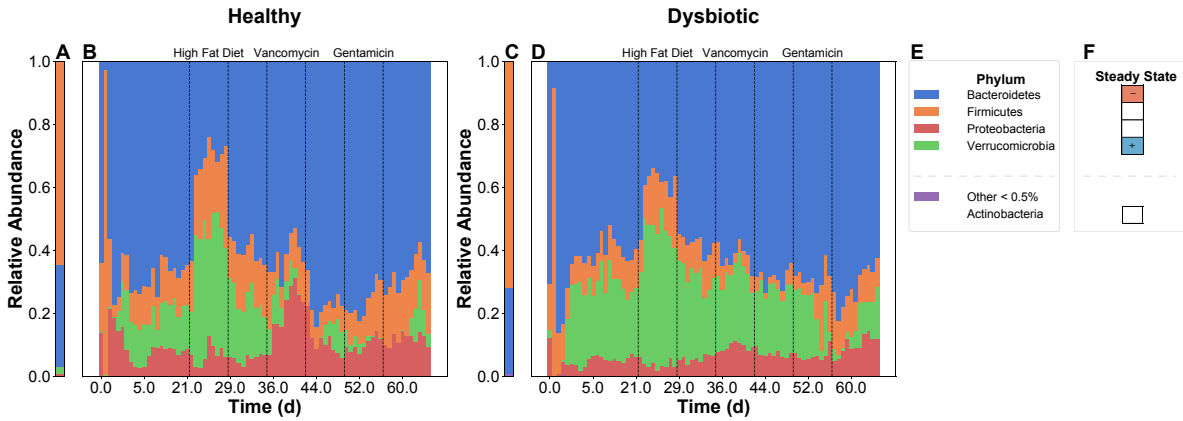

**Supplemental Figure 2: Relative abundance of OTUs in healthy and dysbiotic donor microbiomes at the phylum level. (A)** Relative abundance of microbes in starting inoculum from the healthy donor. **(B)** Relative abundances of microbes in serial fecal samples from mouse cohort receiving healthy donor microbiome, averaged over the biological replicates. **(C), (D)** corresponding data from mouse cohort receiving dysbiotic donor microbiome. **(E)** Legend for figures (A), (B), (C), and (D). **(F)** Significant fold changes in sequencing counts at the phylum level (see Supp Table 2 for *p*-values).

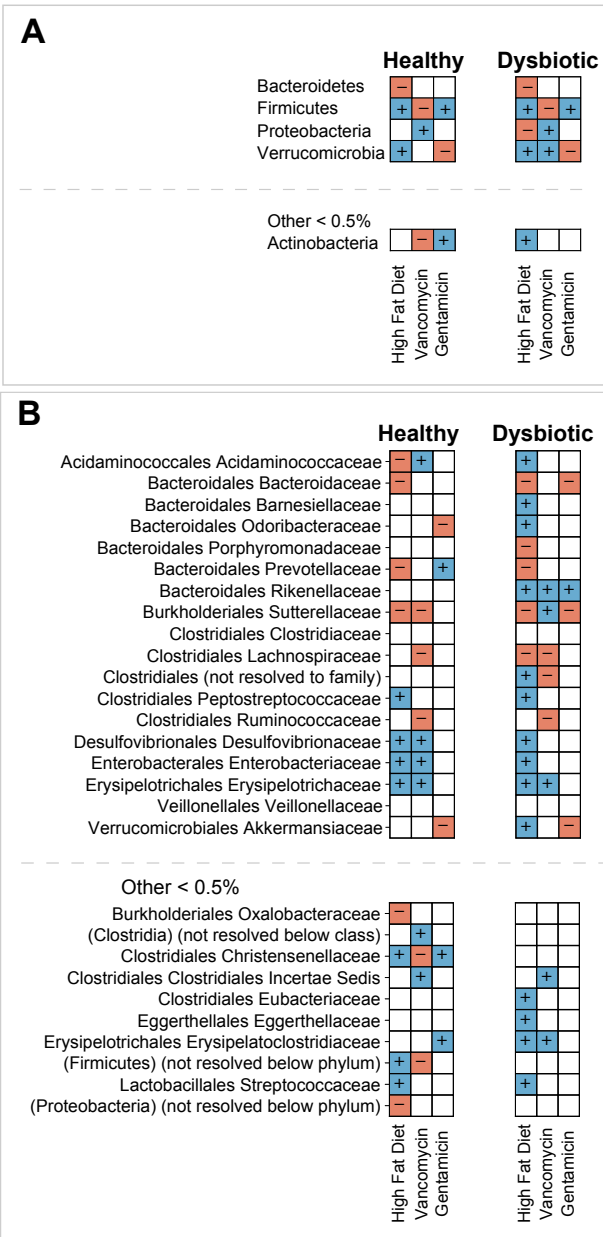

**Supplemental Figure 3: Fold change analysis for perturbation responses at phylum and family levels. (A)** Significant fold changes for the three perturbations at the phylum level (see Sup Table 2 for *p*-values). **(B)** Significant fold changes for the three perturbations at the family level (see Sup Table 2 for *p*-values).

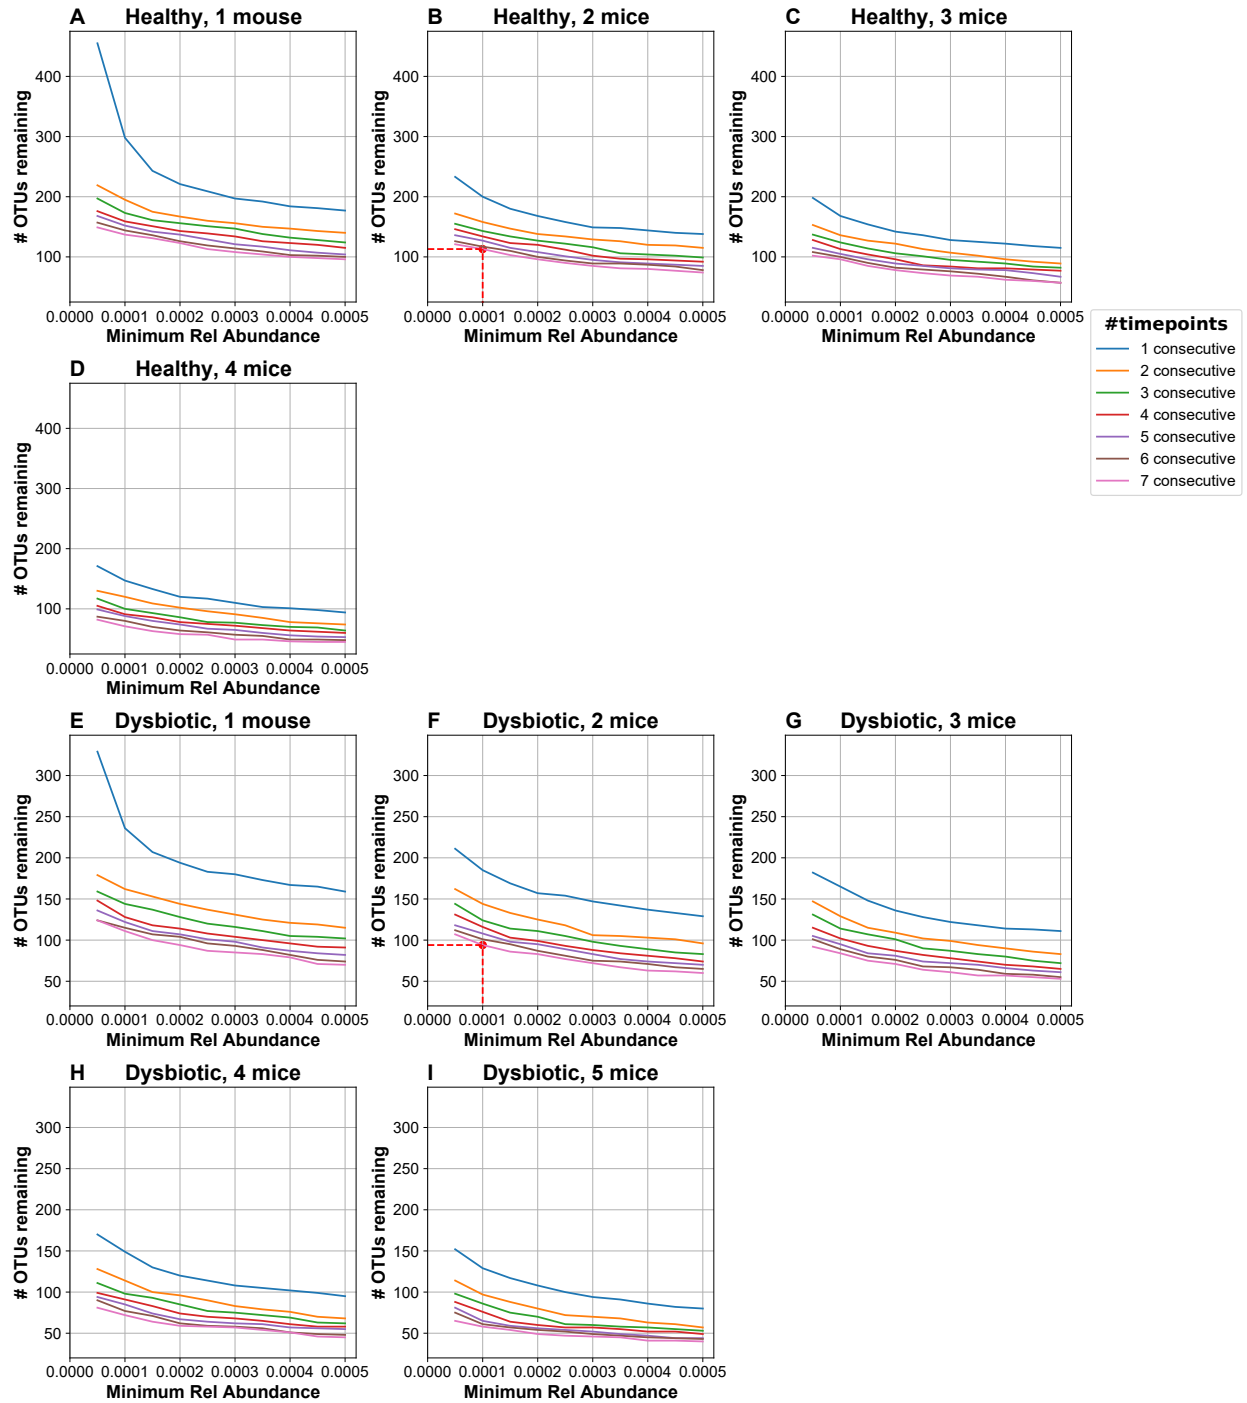

**Supplemental Figure. 4: Filtering criteria for excluding rare and inconsistently colonizing OTUs.** Plots show how many OTUs (y-axis) pass the initial filtering criteria for both healthy and dysbiotic donor microbiomes with varying parameters. To pass initial filtering, OTUs must have achieved a minimum relative abundance of X for Y consecutive timepoints in at least Z subjects after colonization. The filtering allows us to only keep OTUs that have rich dynamical information for inference. We set X, Y, and Z to 0.01%, 7, and 2 respectively, for analyses in this study. These settings and the corresponding number of OTUs that pass the filter are denoted by the red-dashed lines.

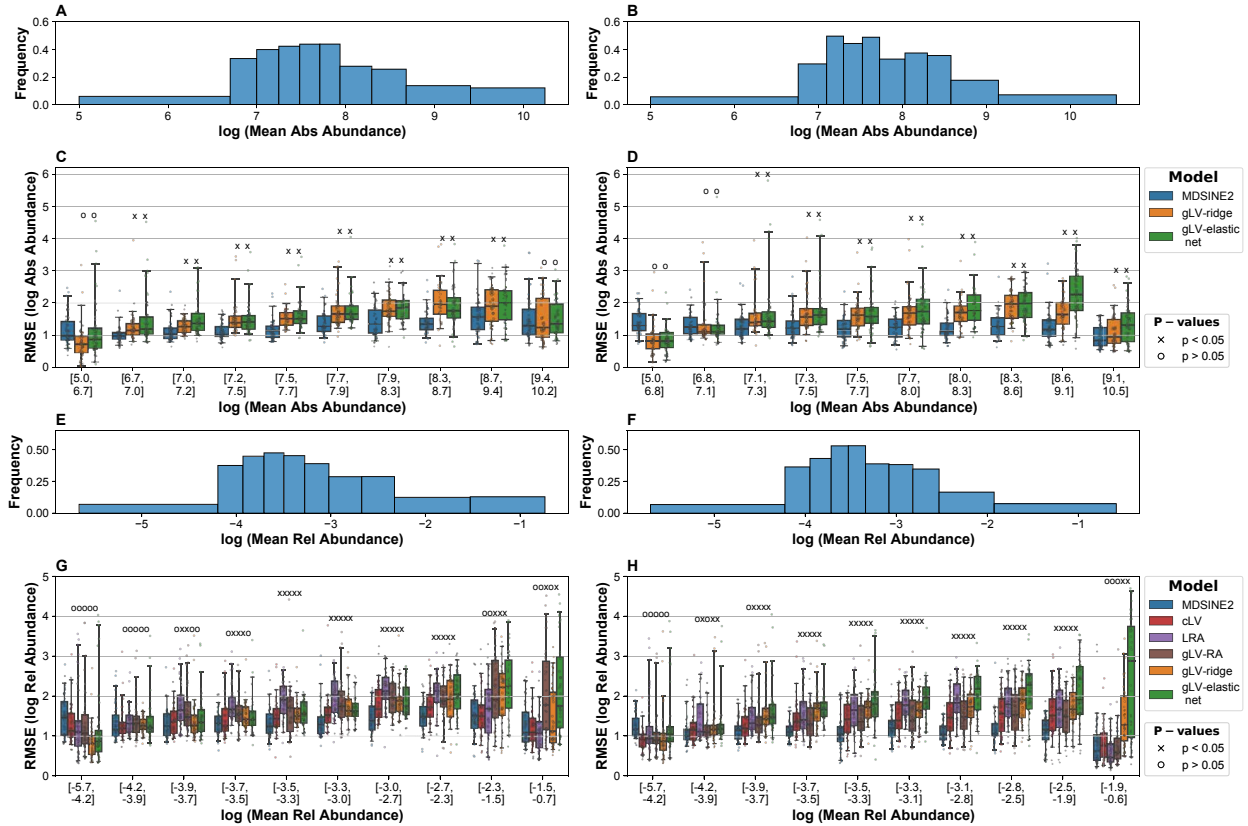

**Supplementary Figure 5: MDSINE2 exhibits higher predictive performance for a wide range of relative and absolute abundances in comparison to state-of-the-art methods.** Predictive performances were evaluated using Root Mean Square Error (RMSE) on forecasted trajectories with hold-one-subject-out cross validation. The significance of difference in RMSE between MDSINE2 and comparator methods was tested using the Signed-Rank Test followed by the Benjamini-Hochberg procedure for multiple comparison correction. MDSINE2, generalized Lotka-Volterra (gLV) with ridge (gLV-ridge) and elastic net regression (gLV-elastic) forecast trajectories in absolute abundance space. Compositional gLV (cLV), Linear Dynamics Relative Abundance (LRA), and gLV trained on relative abundance (gLV-RA) forecast relative abundances. **(A)** Histogram of the mean absolute abundances of OTUs in the healthy donor microbiome. Each bin contains approximately 10% of the total data. **(C)** Box plot showing absolute abundance RMSE of OTUs grouped according to the binning in (A). **(E)** Histogram of the mean relative abundances of OTUs in the healthy donor microbiome. Each bin contains approximately 10 % of the total data. **(G)** Box plot showing relative abundance RMSE of OTUs grouped according to the binning in (E). **(B), (D), (F), (H)** corresponding plots for dysbiotic donor microbiome.

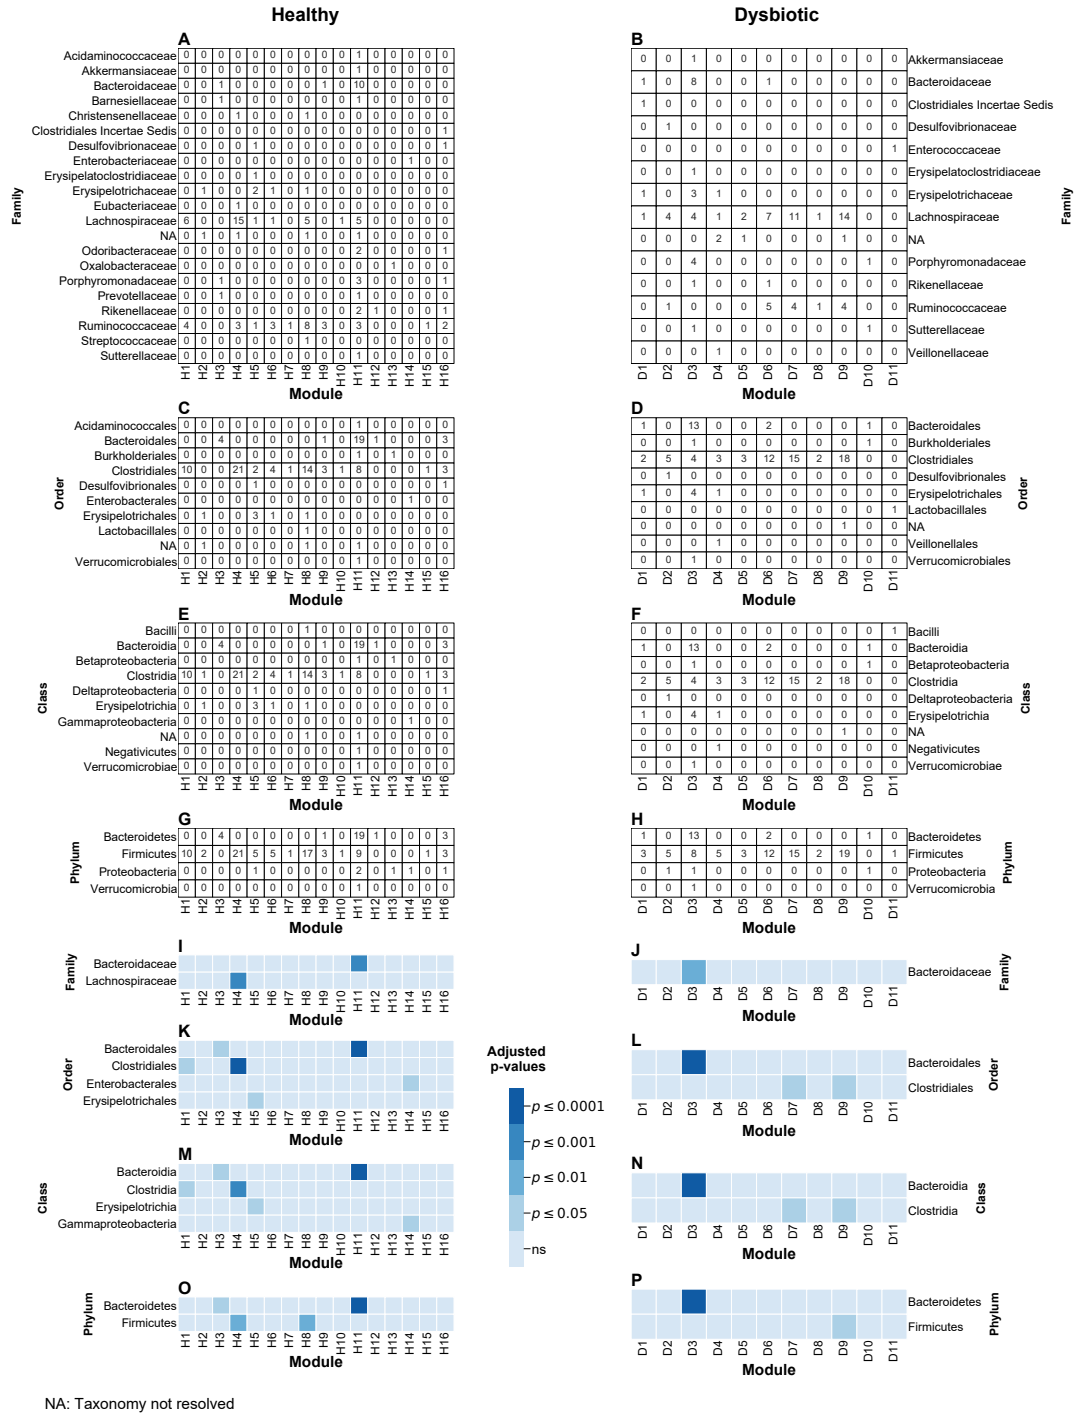

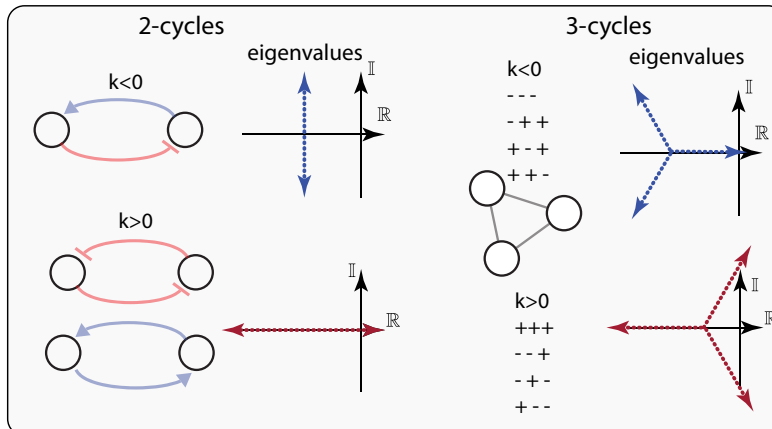

**Supplemental Figure 7: Root locus of 2- and 3-cycles showing asymptotes of their eigenvalues.** Only two cycles with negative feedback are stable for all cycle strengths. All other cycles can become unstable with strong enough interactions.
